# Supplementary material
Source: PubMed Central journal article supplement (PMC6590709)
Supplement: NIHMS1035910-supplement-Supp1.pdf [file NIHMS1035910-supplement-Supp1.pdf]

# Glycosylation in health and disease

---

*Colin Reilly, Tyler J. Stewart, Matthew B. Renfrow and Jan Novak*

<https://doi.org/10.1038/s41581-019-0129-4>

## Supplementary information

Supplementary Table 1: Common mammalian saccharides

| Monosaccharide                | Abbreviation | Symbol                                                                              |
|-------------------------------|--------------|-------------------------------------------------------------------------------------|
| Arabinose                     | Ara          |    |
| Fructose                      | Fru          |    |
| Fucose                        | Fuc          |    |
| Galactose                     | Gal          |    |
| Galactosamine                 | GalN         |    |
| <i>N</i> -acetylgalactosamine | GalNAc       |    |
| Glucose                       | Glc          |    |
| Glucosamine                   | GlcN         |    |
| <i>N</i> -acetylglucosamine   | GlcNAc       |    |
| Glucuronic acid               | GlcA         |    |
| Mannose                       | Man          |   |
| Muramic acid                  | Mur          |  |
| Neuraminic acid               | Neu          |  |
| Sialic acid                   | Sia          |  |
| Rhamnose                      | Rha          |  |
| Ribose                        | Rib          |  |
| Xylose                        | Xyl          |  |

**Supplementary Table 2: Methodologies and techniques for the analysis of glycosylation**

| Method                                                                         | Data Obtained                                                                                                                       | Techniques and/or Reagents                                         | Applications                                                                                      |
|--------------------------------------------------------------------------------|-------------------------------------------------------------------------------------------------------------------------------------|--------------------------------------------------------------------|---------------------------------------------------------------------------------------------------|
| Acid hydrolysis coupled with chromatographic separation and detection          | Monosaccharide compositional analysis                                                                                               | HPEAC-PAG, GC-FL, GC-MS                                            | Fungal polysaccharides enhance cell-mediated immunity <sup>1</sup>                                |
| HPLC profiling of glycoconjugates (released glycans, glycopeptides, GAGs, etc) | Separation of glycoconjugates, identification of glycoconjugates by comparison to reference compounds                               | HILIC-UPLC                                                         | Plasma <i>N</i> -glycans as biomarkers <sup>2</sup>                                               |
| Mass spectrometry (MS, most often combined with HPLC)                          |                                                                                                                                     | LC-MS                                                              | For review see <sup>3</sup>                                                                       |
| Intact glycoproteins and other glycoconjugates                                 | Glycoform heterogeneity in context of intact glycoconjugate                                                                         | Top-down MS                                                        | Characterization of biosimilars and therapeutic antibodies <sup>4</sup>                           |
| Glycopeptides and partially cleaved glycoconjugates                            | Identification, composition, relative abundance, partial quantitation, site-specific context of glycoform heterogeneity.            | Glycosidases + proteases + LC-MS                                   | HIV-1 Env multiple <i>N</i> -glycans <sup>5</sup> ; Glycoproteins as disease markers <sup>6</sup> |
| Released glycans                                                               | Identification, composition, overall trends of glycan composition for the entire sample                                             | PNGase F release + HILIC HPLC + MS & MS/MS                         | Profiling of cell-surface glycans review <sup>7</sup>                                             |
| Tandem mass spectrometry (MS/MS)                                               | Confirmation of glycan composition, some linkage information, identification of sites of attachment for multi-chain glycoconjugates | CID, ETD, EDD                                                      | IgA1 O-glycans <sup>8</sup> ; Chondroitin sulfate GAG <sup>9</sup> ; C1-inhibitor <sup>10</sup>   |
| NMR                                                                            | 3D structural analysis of glycoconjugates including linkage information, dynamics of glycan interactions                            |                                                                    | Glycoprotein analysis <sup>11</sup> ; Heparan sulfate <sup>12</sup>                               |
| Lectin                                                                         | Selective identification/quantification of structural epitopes in cells, tissues and biological fluids                              | Lectin-Western Blot, Lectin-ELISA                                  | Quantitative lectin ELISA <sup>13</sup> ; for review see <sup>14</sup>                            |
| Lectin affinity chromatography                                                 | Selective separation/enrichment of glyconjugate epitopes                                                                            | Jacalin, wheat-germ agglutinin, ConA                               | Biomarker analysis <sup>15,16</sup>                                                               |
| Glycan-specific antibodies                                                     | Detection of selective glycan epitopes in cell culture and tissues.                                                                 | RL2 & CTD110 (O-GlcNAc); 2G12, PG9 ( <i>N</i> -glycans on HIV Env) | O-GlcNAc <sup>17,18</sup> ; HIV <i>N</i> -glycans <sup>19</sup> ; for review see <sup>20</sup>    |
| Exoglycosidases (Combined with various detection methods)                      | Sequence, anomeric configuration, partial linkage confirmation                                                                      | $\alpha$ 2,3 neuraminidase, $\alpha$ 1,6 mannosidase               | Assisted annotation of <i>N</i> -glycans <sup>21</sup>                                            |
| Glycosidase inhibitors                                                         | Can alter glycan production pathways in the cellular environment                                                                    | Mannosidase inhibitors; neuraminidase inhibitors                   | Kifunensine <sup>22</sup> ; Review of neuraminidase inhibitors <sup>23</sup>                      |
| Chemo-enzymatic synthesis of glycans, glycopeptides, and glycoconjugates       | Molecular tools for testing specific glycoforms/glycoconjugates in isolation instead of the context of complex mixtures             |                                                                    | For review see <sup>24,25</sup>                                                                   |
| Engineered glycosyltransferases                                                | Labeling of glycoconjugates for detection or selective attachment of synthetic glycans.                                             |                                                                    | Single-glycoform glycoprotein <sup>26</sup> ; Modulating IgG effector function <sup>27</sup>      |

|                                                       |                                                                                                                                                                                               |                                                        |                                                                                          |
|-------------------------------------------------------|-----------------------------------------------------------------------------------------------------------------------------------------------------------------------------------------------|--------------------------------------------------------|------------------------------------------------------------------------------------------|
| Aptamers                                              | Create novel molecular inhibitors or sensors of specific glycoconjugate epitopes.                                                                                                             | Oligonucleotides or peptides from random sequence pool | Protein-glycan inhibitors <sup>26</sup> ;<br>Molecular sensors <sup>28</sup>             |
| Array technologies                                    |                                                                                                                                                                                               |                                                        |                                                                                          |
| Glycan arrays                                         | High throughput screening of glycan interacting biomolecules across individualized glycoconjugates                                                                                            | Synthetic glycans and glycopeptides                    | Cell-based glycan arrays <sup>29</sup> ;<br>For review see <sup>30</sup>                 |
| Lectin arrays                                         | High throughput screening for multiple specific glycoconjugate epitopes in heterogeneous or complex mixtures.                                                                                 |                                                        | Serum biomarkers <sup>31</sup> ;<br>Detection of pathogenic bacteria <sup>32</sup>       |
| Molecular modeling and molecular dynamics simulations | Visualization and estimations of glycoconjugates as part of larger macromolecular complex to identify intra- and intermolecular interactions that cannot be accomplished by other techniques. | PDB, NMR data, GlyCAM                                  | For review see <sup>33</sup>                                                             |
| Genomics, transcriptomics                             | Cell or tissue-specific expression profiles of glycosyltransferases, gene variants, gene mutations                                                                                            |                                                        | Regulation of glycan structures in tissues <sup>34</sup>                                 |
| Glycomics and glycoproteomics                         | Global identification/quantitation of glycoconjugates in biological systems.                                                                                                                  | All tools above                                        | For review see <sup>35</sup>                                                             |
| Bioinformatics                                        | Combining glycoconjugate profiling with omics-based data to find consensus of biological function and outcomes.                                                                               | Glycomics, genomics, proteomics                        | IgG glycosylation <sup>36</sup> ; Cell surface analysis of B-cell lymphoma <sup>37</sup> |
| Medical bioinformatics                                | Combining glycan analysis and omics technologies with patient clinical data                                                                                                                   | Pattern recognition, phenomics, PubMed + omics data    | For review see <sup>38,39</sup>                                                          |

Abbreviations: HPAEC-PAD, high performance anion-exchange chromatography-pulsed amperometric detection; GC-FL, gas chromatography fluorescence; GC-MS, gas chromatography-mass spectrometry; HILIC-UPLC, hydrophilic interaction liquid chromatography-ultra-performance liquid chromatography; LC-MS, liquid chromatography-mass spectrometry; PNGase F, Peptide: *N*-glycosidase F; MS/MS, tandem mass spectrometry; CID, collision-induced dissociation; ETD, electron-transfer dissociation; EDD, electron-detachment dissociation; ELISA, enzyme-linked immunosorbent assay; PDB, protein data bank.

## References

1. Chen, L. *et al.* Endo-polysaccharide of *Phellinus igniarius* exhibited anti-tumor effect through enhancement of cell-mediated immunity. *Int. Immunopharmacol.* **11**, 255-259, (2011).
2. Doherty, M. *et al.* Plasma N-glycans in colorectal cancer risk. *Sci. Rep.* **8**, 8655, (2018).
3. Yang, Y., Franc, V. & Heck, A. J. R. Glycoproteomics: a balance between high-throughput and in-depth analysis. *Trends Biotechnol.* **35**, 598-609, (2017).
4. Tran, B. Q. *et al.* Comprehensive glycosylation profiling of IgG and IgG-fusion proteins by top-down MS with multiple fragmentation techniques. *J. Proteomics* **134**, 93-101, (2016).
5. Go, E. P. *et al.* Characterization of host-cell line specific glycosylation profiles of early transmitted/founder HIV-1 gp120 envelope proteins. *J. Proteome Res.* **12**, 1223-1234, (2013).
6. Chandler, K. & Goldman, R. Glycoprotein disease markers and single protein-omics. *Mol. Cell. Proteomics* **12**, 836-845, (2013).
7. Chandler, K. B. & Costello, C. E. Glycomics and glycoproteomics of membrane proteins and cell-surface receptors: Present trends and future opportunities. *Electrophoresis* **37**, 1407-1419, (2016).
8. Takahashi, K. *et al.* Naturally occurring structural isomers in serum IgA1 O-glycosylation. *J. Proteome Res.* **11**, 692-702, (2012).
9. Leach, F. E., 3rd *et al.* Hexuronic acid stereochemistry determination in chondroitin sulfate glycosaminoglycan oligosaccharides by electron detachment dissociation. *J. Am. Soc. Mass Spectrom.* **23**, 1488-1497, (2012).
10. Stavenhagen, K. *et al.* N- and O-glycosylation analysis of human C1-inhibitor reveals extensive mucin-type O-Glycosylation. *Mol. Cell. Proteomics* **17**, 1225-1238, (2018).
11. Zhuo, Y., Yang, J. Y., Moremen, K. W. & Prestegard, J. H. Glycosylation alters dimerization properties of a cell-surface signaling protein, carcinoembryonic antigen-related cell adhesion molecule 1 (CEACAM1). *J. Biol. Chem.* **291**, 20085-20095, (2016).
12. Gao, Q. *et al.* Structural aspects of heparan sulfate binding to robo1-Ig1-2. *ACS Chem. Biol.* **11**, 3106-3113, (2016).
13. Moldoveanu, Z. *et al.* Patients with IgA nephropathy have increased serum galactose-deficient IgA1 levels. *Kidney Int.* **71**, 1148-1154, (2007).
14. Hendrickson, O. D. & Zherdev, A. V. Analytical application of lectins. *Crit. Rev. Anal. Chem.* **48**, 279-292, (2018).
15. Totten, S. M. *et al.* Multi-lectin affinity chromatography and quantitative proteomic analysis reveal differential glycoform levels between prostate cancer and benign prostatic hyperplasia sera. *Sci. Rep.* **8**, 6509, (2018).
16. Darula, Z., Sarnyai, F. & Medzihradzky, K. F. O-glycosylation sites identified from mucin core-1 type glycopeptides from human serum. *Glycoconj. J.* **33**, 435-445, (2016).
17. Mullis, K. G., Haltiwanger, R. S., Hart, G. W., Marchase, R. B. & Engler, J. A. Relative accessibility of N-acetylglucosamine in trimers of the adenovirus types 2 and 5 fiber proteins. *J. Virol.* **64**, 5317-5323, (1990).
18. Comer, F. I., Vosseller, K., Wells, L., Accavitti, M. A. & Hart, G. W. Characterization of a mouse monoclonal antibody specific for O-linked N-acetylglucosamine. *Anal. Biochem.* **293**, 169-177, (2001).
19. Walker, L. M. *et al.* Broad neutralization coverage of HIV by multiple highly potent antibodies. *Nature* **477**, 466-470, (2011).
20. Sterner, E., Flanagan, N. & Gildersleeve, J. C. Perspectives on anti-glycan antibodies gleaned from development of a community resource database. *ACS Chem. Biol.* **11**, 1773-1783, (2016).
21. Aldredge, D., An, H. J., Tang, N., Waddell, K. & Lebrilla, C. B. Annotation of a serum N-glycan library for rapid identification of structures. *J. Proteome Res.* **11**, 1958-1968, (2012).
22. Gebuhr, I. *et al.* Differential expression and function of alpha-mannosidase I in stimulated naive and memory CD4+ T cells. *J. Immunother.* **34**, 428-437, (2011).
23. Laborda, P., Wang, S. Y. & Voglmeir, J. Influenza neuraminidase inhibitors: synthetic approaches, derivatives and biological activity. *Molecules* **21**, (2016).
24. Li, T., Li, C., Quan, D. N., Bentley, W. E. & Wang, L. X. Site-specific immobilization of endoglycosidases for streamlined chemoenzymatic glycan remodeling of antibodies. *Carbohydr. Res.* **458-459**, 77-84, (2018).
25. Li, C. & Wang, L. X. Chemoenzymatic methods for the synthesis of glycoproteins. *Chem. Rev.* **118**, 8359-8413, (2018).
26. Schwarz, F. *et al.* A combined method for producing homogeneous glycoproteins with eukaryotic N-glycosylation. *Nat. Chem. Biol.* **6**, 264-266, (2010).

27. Li, T. *et al.* Modulating IgG effector function by Fc glycan engineering. *Proc. Natl. Acad. Sci. U. S. A.* **114**, 3485-3490, (2017).
28. Chen, Y., Ding, L., Song, W., Yang, M. & Ju, H. Liberation of protein-specific glycosylation information for glycan analysis by exonuclease III-aided recycling hybridization. *Anal. Chem.* **88**, 2923-2928, (2016).
29. Briard, J. G., Jiang, H., Moremen, K. W., Macauley, M. S. & Wu, P. Cell-based glycan arrays for probing glycan-glycan binding protein interactions. *Nat. Commun.* **9**, 880, (2018).
30. Geissner, A. & Seeberger, P. H. Glycan Arrays: From basic biochemical research to bioanalytical and biomedical applications. *Annu. Rev. Anal. Chem.* **9**, 223-247, (2016).
31. Shah, A. K. *et al.* Evaluation of serum glycoprotein biomarker candidates for detection of esophageal adenocarcinoma and surveillance of Barrett's esophagus. *Mol. Cell. Proteomics*, (2018).
32. Saucedo, N. M., Gao, Y., Pham, T. & Mulchandani, A. Lectin- and saccharide-functionalized nanochemiresistor arrays for detection and identification of pathogenic bacteria infection. *Biosensors* **8**, (2018).
33. Woods, R. J. Predicting the structures of glycans, glycoproteins, and their complexes. *Chem. Rev.* **118**, 8005-8024, (2018).
34. Nairn, A. V. *et al.* Regulation of glycan structures in animal tissues: transcript profiling of glycan-related genes. *J. Biol. Chem.* **283**, 17298-17313, (2008).
35. Dong, X. *et al.* Advances in mass spectrometry-based glycomics. *Electrophoresis*, (2018).
36. Benedetti, E. *et al.* Network inference from glycoproteomics data reveals new reactions in the IgG glycosylation pathway. *Nat. Commun.* **8**, 1483, (2017).
37. Deeb, S. J., Cox, J., Schmidt-Supprian, M. & Mann, M. N-linked glycosylation enrichment for in-depth cell surface proteomics of diffuse large B-cell lymphoma subtypes. *Mol. Cell. Proteomics* **13**, 240-251, (2014).
38. Ferreira, C. R. *et al.* Recognizable phenotypes in CDG. *J. Inherit. Metab. Dis.* **41**, 541-553, (2018).
39. Everest-Dass, A. V., Moh, E. S. X., Ashwood, C., Shathili, A. M. M. & Packer, N. H. Human disease glycomics: technology advances enabling protein glycosylation analysis - part 2. *Expert Rev. Proteomics* **15**, 341-352, (2018).
